# Supplementary material for: Oral Nutritional Supplementation Improves Growth in Children at Malnutrition Risk and with Picky Eating Behaviors
Source: MDPI journal article supplement (doi:10.3390/nu13103590), 2021-10-14
Supplement: s1 [file s1]

**Table 1S. Composition of Oral Nutritional Supplements (ONS) 1 and 2.**

Abbreviations: CFU, colony-forming units; NE, RE, TE, niacin-, retinol-, tocopherol-equivalents

|                              | Units   | ONS1, Content per |         | ONS2, Content per |                      |
|------------------------------|---------|-------------------|---------|-------------------|----------------------|
|                              |         | 100g              | Serving | 100g              | Serving              |
| Energy                       | Kcal    | 462               | 210.2   | 468               | 212.9                |
| Protein                      | g       | 14.1              | 6.4     | 14.1              | 6.4                  |
| Fat                          | g       | 17                | 7.7     | 23.4              | 10.6                 |
| Linoleic Acid                | g       | 3.5               | 1.6     | 3.6               | 1.6                  |
| Linolenic Acid               | g       | 0.38              | 0.2     | 0.4               | 0.2                  |
| Carbohydrate                 | g       | 62.7              | 28.5    | 50.21             | 22.8                 |
| Fructo-<br>oligosaccharides  | g       | 1.58              | 0.7     | 1.58              | 0.7                  |
| Taurine                      | mg      | 28                | 12.7    | 28                | 12.7                 |
| Carnitine                    | mg      | 6.7               | 3.0     | 6.7               | 3.0                  |
| Inositol                     | mg      | 32                | 14.6    | 32                | 14.6                 |
| Lactobacillus<br>acidophilus | CFU     | NA                | NA      | 1x10 <sup>8</sup> | 45.5x10 <sup>6</sup> |
| Bifidobacterium<br>spp.      | CFU     | NA                | NA      | 1x10 <sup>8</sup> | 45.5x10 <sup>6</sup> |
| Vitamin A                    | mcg RE  | 305               | 138.8   | 305               | 138.8                |
| Vitamin D2                   | mcg     | 3.15              | 1.4     | 3.15              | 1.4                  |
| Vitamin E                    | mg α-TE | 11                | 5.0     | 11                | 5.0                  |
| Vitamin K                    | mcg     | 17.5              | 8.0     | 17.5              | 8.0                  |
| Vitamin C                    | mg      | 44                | 20.0    | 44                | 20.0                 |
| Folic Acid                   | mcg     | 100               | 45.5    | 100               | 45.5                 |
| Vitamin B1                   | mg      | 0.9               | 0.4     | 0.9               | 0.4                  |
| Vitamin B2                   | mg      | 1                 | 0.5     | 1                 | 0.5                  |
| Vitamin B6                   | mg      | 1                 | 0.5     | 1                 | 0.5                  |
| Vitamin B12                  | mcg     | 1.5               | 0.7     | 1.5               | 0.7                  |
| Niacin                       | mg-NE   | 7                 | 3.2     | 7                 | 3.2                  |
| Pantothenic Acid             | mg      | 3.1               | 1.4     | 3.1               | 1.4                  |
| Biotin                       | mcg     | 16                | 7.3     | 16                | 7.3                  |
| Choline                      | mg      | 118               | 53.7    | 118               | 53.7                 |
| Sodium                       | mg      | 181               | 82.4    | 181               | 82.4                 |

|            |     |      |       |      |       |
|------------|-----|------|-------|------|-------|
| Potassium  | mg  | 512  | 233.0 | 512  | 233.0 |
| Chloride   | mg  | 394  | 179.3 | 394  | 179.3 |
| Calcium    | mg  | 386  | 175.6 | 386  | 175.6 |
| Phosphorus | mg  | 240  | 109.2 | 240  | 109.2 |
| Magnesium  | mg  | 78   | 35.5  | 78   | 35.5  |
| Iron       | mg  | 5.5  | 2.5   | 5.5  | 2.5   |
| Zinc       | mg  | 3.5  | 1.6   | 3.5  | 1.6   |
| Manganese  | mg  | 0.98 | 0.4   | 0.98 | 0.4   |
| Copper     | mcg | 400  | 182.0 | 400  | 182.0 |
| Iodine     | mcg | 38   | 17.3  | 38   | 17.3  |
| Selenium   | mcg | 12.3 | 5.6   | 12.3 | 5.6   |
| Chromium   | mcg | 12   | 5.5   | 12   | 5.5   |
| Molybdenum | mcg | 19.7 | 9.0   | 19.7 | 9.0   |
