# Supplementary material for: Oral Nutritional Supplementation Improves Growth in Children at Malnutrition Risk and with Picky Eating Behaviors
Source: MDPI journal article supplement (doi:10.3390/nu13103590), 2021-10-14
Supplement: s1 [file s1]

**Table 2S. Changes in weight (kg), height (cm), BMI (kg/m<sup>2</sup>) and MUAC (cm) across all time points.** Green shading represents p values that are statistically significant differences.

| Anthropometric measures<br>Median (Q1, Q3) | Change across time points from | ONS1 + DC           | ONS2 + DC           | DC only             | P value                   |                         |                         |
|--------------------------------------------|--------------------------------|---------------------|---------------------|---------------------|---------------------------|-------------------------|-------------------------|
|                                            |                                |                     |                     |                     | ONS1 + DC vs<br>ONS2 + DC | ONS1 + DC vs<br>DC only | ONS2 + DC vs<br>DC only |
| Weight                                     | Day 1 to 7                     | 0.13<br>(0.00,0.30) | 0.10<br>(0.00,0.23) | 0.10<br>(0.00,0.20) | 0.2536                    | 0.0222                  | 0.3277                  |
|                                            | Day 1 to 30                    | 0.40<br>(0.20,0.70) | 0.40<br>(0.17,0.70) | 0.30<br>(0.10,0.50) | 0.5164                    | 0.0015                  | 0.0140                  |
|                                            | Day 1 to 60                    | 0.70<br>(0.40,1.10) | 0.60<br>(0.30,1.10) | 0.50<br>(0.30,0.70) | 0.3187                    | 0.0043                  | 0.1377                  |
|                                            | Day 1 to 90                    | 0.88<br>(0.58,1.35) | 0.80<br>(0.60,1.30) | 0.62<br>(0.45,0.90) | 0.9517                    | 0.0012                  | 0.0012                  |
| Height                                     | Day 1 to 30                    | 0.20<br>(0.00,0.80) | 0.15<br>(0.00,0.50) | 0.10<br>(0.00,0.50) | 1.0000                    | 0.9184                  | 1.0000                  |
|                                            | Day 1 to 60                    | 0.50<br>(0.10,1.55) | 0.50<br>(0.10,1.50) | 0.30<br>(0.05,1.35) | 1.0000                    | 1.0000                  | 1.0000                  |
|                                            | Day 1 to 90                    | 0.90<br>(0.20,2.18) | 0.70<br>(0.20,2.30) | 0.60<br>(0.15,1.95) | 0.7910                    | 0.5257                  | 0.7910                  |
| BMI                                        | Day 1 to 30                    | 0.39<br>(0.16,0.73) | 0.35<br>(0.15,0.77) | 0.27<br>(0.12,0.47) | 0.8020                    | 0.0172                  | 0.0358                  |
|                                            | Day 1 to 60                    | 0.62<br>(0.36,1.00) | 0.54<br>(0.28,1.00) | 0.43<br>(0.23,0.74) | 0.5625                    | 0.0075                  | 0.0746                  |
|                                            | Day 1 to 90                    | 0.73<br>(0.45,1.35) | 0.74<br>(0.50,1.33) | 0.58<br>(0.32,0.89) | 0.5829                    | 0.0185                  | 0.0064                  |
| MUAC                                       | Day 1 to 30                    | 0.10<br>(0.00,0.30) | 0.10<br>(0.00,0.20) | 0.05<br>(0.00,0.15) | 0.1685                    | 0.0949                  | 0.6532                  |
|                                            | Day 1 to 60                    | 0.28<br>(0.10,0.60) | 0.20<br>(0.05,0.40) | 0.10<br>(0.00,0.30) | 0.3410                    | 0.0230                  | 0.3410                  |
|                                            | Day 1 to 90                    | 0.34<br>(0.10,0.78) | 0.30<br>(0.10,0.70) | 0.20<br>(0.05,0.50) | 0.4195                    | 0.0418                  | 0.2311                  |
