# Supplementary material for: Oral Nutritional Supplementation Improves Growth in Children at Malnutrition Risk and with Picky Eating Behaviors
Source: MDPI journal article supplement (doi:10.3390/nu13103590), 2021-10-14
Supplement: s1 [file s1]

**Table 4S. Changes in weight-for-age, height-for-age, BMI-for-age, MUAC-for-age, and weight-for-height Z-scores across all time points.** Green-shaded boxes highlight statistically significant differences.

| Anthropometric indices<br>Median (Q1, Q3) | Change across time points from | ONS1 + DC             | ONS2 + DC             | DC only                 | P value                |                      |                      |
|-------------------------------------------|--------------------------------|-----------------------|-----------------------|-------------------------|------------------------|----------------------|----------------------|
|                                           |                                |                       |                       |                         | ONS1 + DC vs ONS2 + DC | ONS1 + DC vs DC only | ONS2 + DC vs DC only |
| Weight-for-age                            | Day 1 to 7                     | 0.08<br>(-0.02,0.19)  | 0.05<br>(-0.02,0.14)  | 0.04<br>(-0.02,0.10)    | 0.2505                 | 0.0165               | 0.3234               |
|                                           | Day 1 to 30                    | 0.21<br>(0.05,0.42)   | 0.17<br>(0.02,0.42)   | 0.10<br>(-0.01,0.23)    | 0.5141                 | 0.0018               | 0.0128               |
|                                           | Day 1 to 60                    | 0.30<br>(0.10,0.56)   | 0.24<br>(0.06,0.56)   | 0.19<br>(0.03,0.32)     | 0.3859                 | 0.0056               | 0.1324               |
|                                           | Day 1 to 90                    | 0.36 (0.11, 0.70)     | 0.31 (0.17, 0.61)     | 0.21 (0.05, 0.37)       | 0.8905                 | 0.0015               | 0.0020               |
| Height-for-age                            | Day 1 to 30                    | -0.10<br>(-0.15,0.05) | -0.10<br>(-0.15,0.00) | -0.11<br>(-0.16, -0.03) | 1.0000                 | 1.0000               | 1.0000               |
|                                           | Day 1 to 60                    | -0.19<br>(-0.29,0.11) | -0.18<br>(-0.28,0.07) | -0.18<br>(-0.28,0.03)   | 1.0000                 | 1.0000               | 1.0000               |
|                                           | Day 1 to 90                    | -0.20<br>(-0.39,0.12) | -0.27<br>(-0.40,0.07) | -0.28<br>(-0.38,0.02)   | 1.0000                 | 1.0000               | 1.0000               |
| BMI-for-age                               | Day 1 to 30                    | 0.37<br>(0.17,0.68)   | 0.34<br>(0.17,0.71)   | 0.27<br>(0.13,0.46)     | 0.8901                 | 0.0150               | 0.0334               |
|                                           | Day 1 to 60                    | 0.57<br>(0.38,0.93)   | 0.52<br>(0.29,0.91)   | 0.42<br>(0.25,0.69)     | 0.5338                 | 0.0067               | 0.0750               |
|                                           | Day 1 to 90                    | 0.71<br>(0.48,1.15)   | 0.75<br>(0.53,1.19)   | 0.60<br>(0.34,0.81)     | 0.4937                 | 0.0196               | 0.0044               |
| MUAC-for-age                              | Day 1 to 30                    | 0.06<br>(-0.03,0.21)  | 0.03<br>(-0.03,0.14)  | 0.00<br>(-0.04,0.13)    | 0.1572                 | 0.0929               | 0.6458               |
|                                           | Day 1 to 60                    | 0.17<br>(0.02,0.43)   | 0.10<br>(0.00,0.30)   | 0.04<br>(-0.06,0.23)    | 0.2722                 | 0.0192               | 0.2722               |
|                                           | Day 1 to 90                    | 0.24<br>(0.03,0.56)   | 0.17<br>(-0.01,0.45)  | 0.11<br>(-0.04,0.30)    | 0.4744                 | 0.0391               | 0.1714               |
| Weight-for-height                         | Day 1 to 30                    | 0.34<br>(0.15,0.65)   | 0.32<br>(0.14,0.69)   | 0.24<br>(0.11,0.41)     | 0.8654                 | 0.0156               | 0.0299               |
|                                           | Day 1 to 60                    | 0.54<br>(0.34,0.92)   | 0.48<br>(0.26,0.89)   | 0.40<br>(0.20,0.63)     | 0.5270                 | 0.0056               | 0.0707               |
|                                           | Day 1 to 90                    | 0.66<br>(0.43,1.10)   | 0.70<br>(0.46,1.10)   | 0.53<br>(0.28,0.78)     | 0.5992                 | 0.0138               | 0.0046               |
