# Supplementary material for: Oral Nutritional Supplementation Improves Growth in Children at Malnutrition Risk and with Picky Eating Behaviors
Source: MDPI journal article supplement (doi:10.3390/nu13103590), 2021-10-14
Supplement: s1 [file s1]

**Table 3S. Changes in weight-for-age, height-for-age, BMI-for-age, MUAC-for-age, and weight-for-height percentiles across all time points.** Green shaded boxes highlight statistically significant differences.

| Anthropometric indices<br>Median (Q1, Q3) | Change across time points from | ONS1 + DC             | ONS2 + DC             | DC only               | P value                |                      |                      |
|-------------------------------------------|--------------------------------|-----------------------|-----------------------|-----------------------|------------------------|----------------------|----------------------|
|                                           |                                |                       |                       |                       | ONS1 + DC vs ONS2 + DC | ONS1 + DC vs DC only | ONS2 + DC vs DC only |
| Weight-for-age                            | Day 1 to 7                     | 0.30<br>(0.00,1.80)   | 0.20<br>(-0.10,1.60)  | 0.20<br>(0.00,0.90)   | 0.6878                 | 0.3179               | 0.6878               |
|                                           | Day 1 to 30                    | 0.80<br>(0.10,3.70)   | 0.60<br>(0.00,3.30)   | 0.40<br>(0.00,1.60)   | 0.5071                 | 0.0489               | 0.1540               |
|                                           | Day 1 to 60                    | 1.30<br>(0.30,5.60)   | 0.90<br>(0.00,5.80)   | 0.60<br>(0.00,3.00)   | 0.3222                 | 0.0139               | 0.3222               |
|                                           | Day 1 to 90                    | 1.65<br>(0.30,8.10)   | 2.40<br>(0.10,7.80)   | 0.70<br>(0.00,2.80)   | 0.9631                 | 0.0054               | 0.0054               |
| Height-for-age                            | Day 1 to 30                    | -0.15<br>(-2.00,0.10) | -0.30<br>(-2.50,0.00) | -0.20<br>(-3.00,0.00) | 0.4728                 | 0.4728               | 0.9800               |
|                                           | Day 1 to 60                    | -0.10<br>(-3.80,0.30) | -0.20<br>(-3.40,0.20) | -0.20<br>(-3.00,0.10) | 1.0000                 | 1.0000               | 1.0000               |
|                                           | Day 1 to 90                    | -0.10<br>(-3.75,0.50) | -0.30<br>(-6.10,0.20) | -0.20<br>(-5.10,0.00) | 0.4323                 | 0.4323               | 0.8382               |
| BMI-for-age                               | Day 1 to 30                    | 9.55<br>(3.00,16.40)  | 7.10<br>(2.50,16.40)  | 4.70<br>(2.10,10.10)  | 0.5369                 | 0.0048               | 0.0523               |
|                                           | Day 1 to 60                    | 14.85<br>(6.80,24.90) | 12.10<br>(4.50,25.90) | 8.90<br>(4.80,18.00)  | 0.5278                 | 0.0098               | 0.1182               |
|                                           | Day 1 to 90                    | 18.35<br>(9.00,36.85) | 18.75<br>(7.60,37.65) | 13.50<br>(6.50,23.50) | 0.9206                 | 0.0214               | 0.0203               |
| MUAC-for-age                              | Day 1 to 30                    | 0.60<br>(-0.40,4.40)  | 0.10<br>(-0.50,1.60)  | 0.00<br>(-0.50,1.60)  | 0.3512                 | 0.1368               | 0.4851               |
|                                           | Day 1 to 60                    | 1.60<br>(0.00,10.00)  | 1.10<br>(0.00,8.80)   | 0.20<br>(-0.80,3.40)  | 0.4940                 | 0.0342               | 0.1445               |
|                                           | Day 1 to 90                    | 2.65<br>(0.00,13.45)  | 2.95<br>(0.00,11.60)  | 0.50<br>(-0.80,5.40)  | 0.5356                 | 0.0241               | 0.1071               |
| Weight-for-height                         | Day 1 to 30                    | 7.35<br>(2.20,12.70)  | 5.30<br>(2.00,13.50)  | 3.70<br>(1.50,7.10)   | 0.5157                 | 0.0036               | 0.0493               |
|                                           | Day 1 to 60                    | 0.58<br>(0.36,0.95)   | 0.53<br>(0.32,0.93)   | 0.42<br>(0.25,0.69)   | 0.7850                 | 0.0063               | 0.0205               |
|                                           | Day 1 to 90                    | 14.85<br>(6.60,28.20) | 15.15<br>(6.65,28.55) | 9.50<br>(5.30,17.60)  | 0.9348                 | 0.0086               | 0.0086               |
