# Supplementary material for: Oral Nutritional Supplementation Improves Growth in Children at Malnutrition Risk and with Picky Eating Behaviors
Source: Nutrients. 2021 Oct 14;13(10):3590. doi: 10.3390/nu13103590 (PMC8538528; doi:10.3390/nu13103590)
Supplement: Supplementary file 1 [file nutrients-13-03590-s001.zip]

Archive with 4 entries (4 files):
- Table 1S.pdf
- Table 2S.pdf
- Table 3S.pdf
- Table 4S.pdf
